# Supplementary material for: The Arabidopsis JMJ29 Protein Controls Circadian Oscillation through Diurnal Histone Demethylation at the CCA1 and PRR9 Loci
Source: PubMed Central journal article supplement (PMC8066055; doi:10.3390/genes12040529), 2021-04-05
Supplement: genes-12-00529-s001.pdf [file genes-12-00529-s001.pdf]

## Supplementary Figures

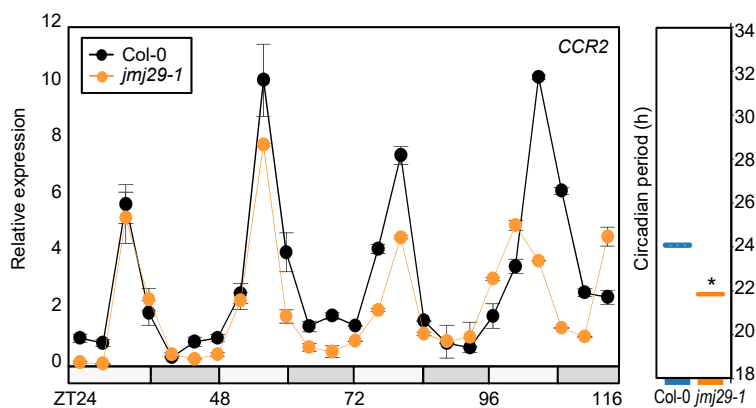

### Supplementary Figure S1. Circadian expression of *CCR2* in *jmj29-1*

Two-week-old seedlings grown under neutral day (ND) conditions were transferred to continuous light (LL) conditions at ZT0. Whole seedlings were harvested from ZT24 to ZT116 to analyze transcript accumulation. Two technical replicates were averaged, and period estimates were calculated using FFT-NLLS (Biodare2). Bars indicate the standard error of the mean. The white and grey boxes indicate the subjective day and night, respectively.

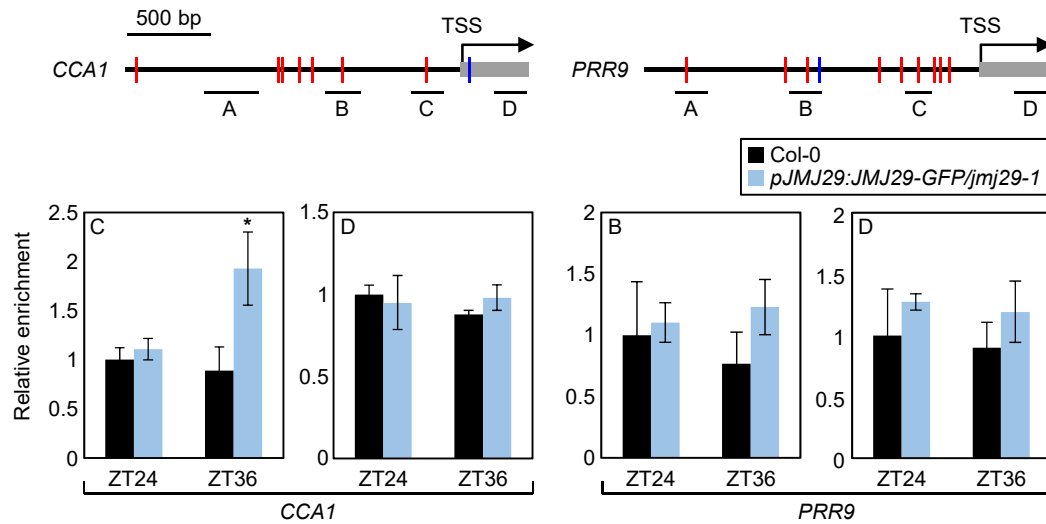

### Supplementary Figure S2. Binding of JMJ29 to coding regions of *CCA1* and *PRR9*

Two-week-old plants entrained with ND cycles were subjected to LL at ZT0. Plants were harvested at ZT24 and ZT36 for ChIP analysis with anti-GFP antibody. Enrichment of fragmented genomic regions was analyzed by ChIP-qPCR. Biological triplicates were averaged, and statistical significance was determined by Student's *t*-test ( $*P < 0.05$ ). Bars indicate standard error of the mean. TSS, transcription start site.

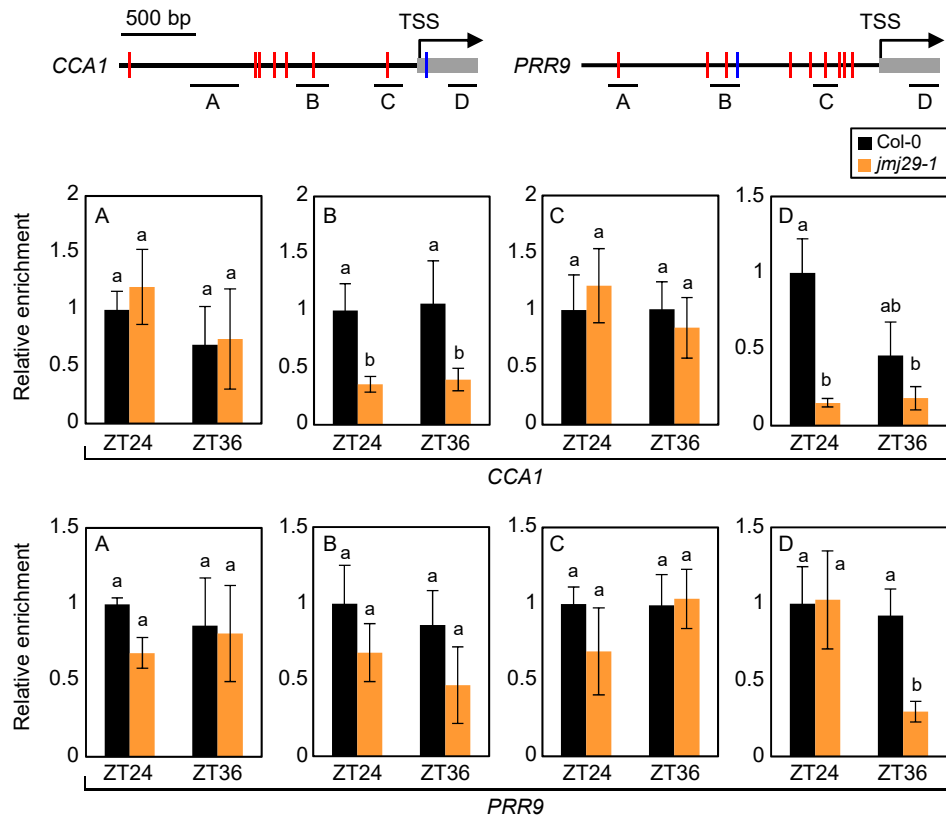

### Supplementary Figure S3. H3K9me2 accumulation at the *CCA1* and *PRR9* loci

Two-week-old plants entrained with ND cycles were subjected to LL at ZT0. Plants were harvested at ZT24 and ZT36 for ChIP analysis with anti-H3K9me2 antibody. Enrichment of fragmented genomic regions was analyzed by ChIP-qPCR. Different letters represent a significant difference at  $P < 0.05$  (one-way ANOVA with Fisher's *post hoc* test). Biological triplicates were averaged. Bars indicate the standard error of the mean. TSS, transcription start site.

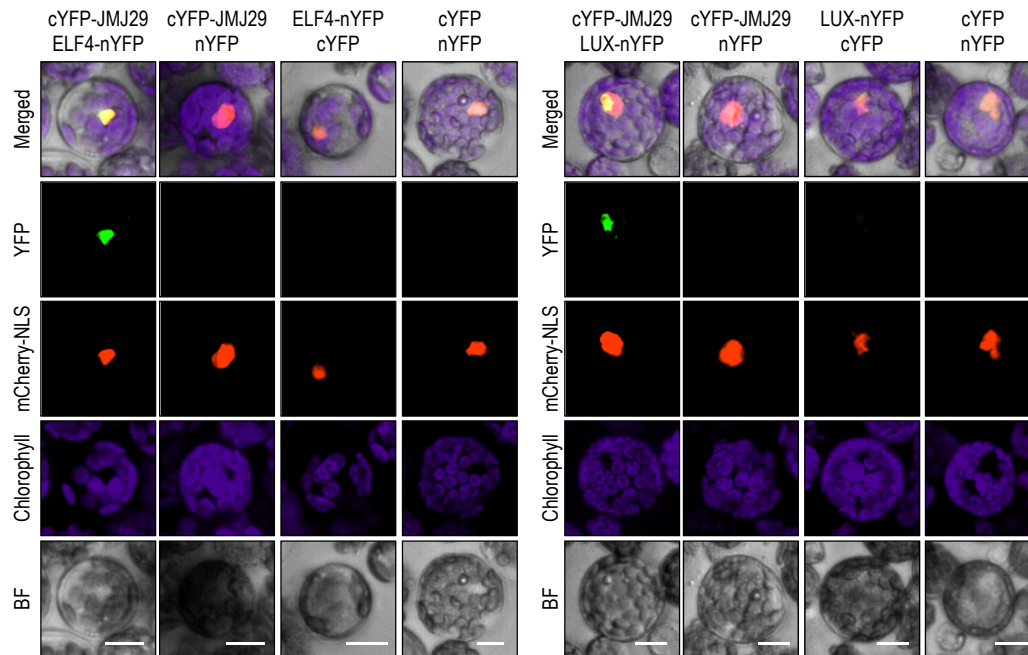

**Supplementary Figure S4. Interaction of JMJ29 with ELF4 and LUX**

Constructs expressing JMJ29, ELF4 and LUX fused either to the N-terminus or C-terminus fragment of YFP were co-transfected into *Arabidopsis* protoplast cells. Scale bars = 20  $\mu$ m. BF, bright field.

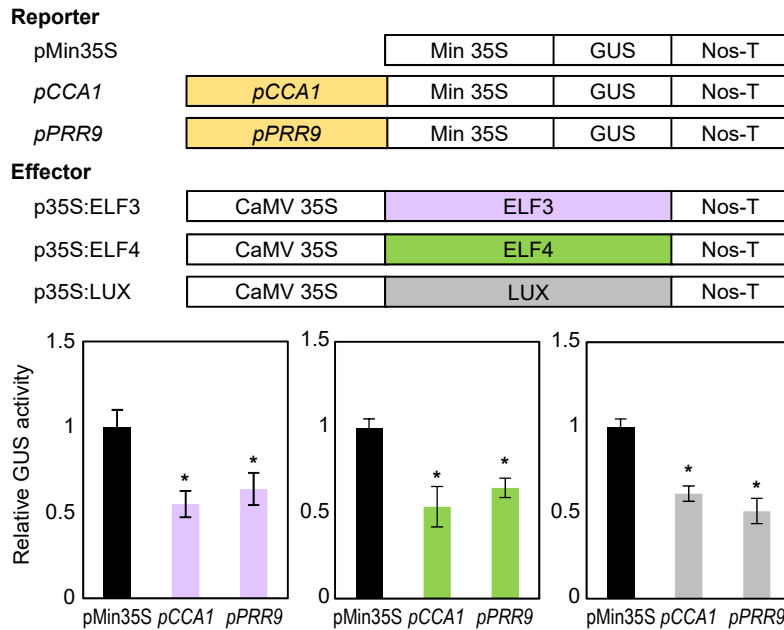

### Supplementary Figure S5. Transient expression assays using *Arabidopsis* protoplasts

The recombinant reporter and effector constructs were co-expressed transiently in *Arabidopsis* protoplasts, and GUS activity was determined. Luciferase gene expression was used to normalize GUS activity. The normalized values in control protoplasts were set to 1 and represented as relative activation. Biological triplicates were averaged, and statistical significance was determined by Student's *t*-test ( $*P < 0.05$ ). Bars indicate the standard error of the mean.

# Supplementary Tables

**Supplementary Table S1. List of primers used in this study**

| <b>Primer</b>     | <b>Usage</b> | <b>Sequence</b>                                     |
|-------------------|--------------|-----------------------------------------------------|
| eIF4a-F           | RT-qPCR      | 5' -TGACCACACAGTCTCTGCAA                            |
| eIF4a-R           | RT-qPCR      | 5' -ACCAGGGAGACTTGTGGAC                             |
| JMJ29-F           | RT-qPCR      | 5' -GATCGAGCCATGGACATTTG                            |
| JMJ29-R           | RT-qPCR      | 5' -GCGACTTTTGTGCACGACTT                            |
| CCA1-F            | RT-qPCR      | 5' -GATCTGGTTATTAAGACTCGGAAGCCATATAC                |
| CCA1-R            | RT-qPCR      | 5' -GCCTCTTTCTCTACCTTGGAGA                          |
| PRR9-F            | RT-qPCR      | 5' -TTGGTCCTGAGCTTGGACTTT                           |
| PRR9-R            | RT-qPCR      | 5' -GCTTACGCTTGATGATCCGA                            |
| CCR2-F            | RT-qPCR      | 5' -CGTTATTGATTCCAAGATCA                            |
| CCR2-R            | RT-qPCR      | 5' -ATCCTTCATGGCTTTCTCAT                            |
| pCCA1-F (pMin35S) | cloning      | 5' -GAGGATCCGAACCTGTAGGCATCGGTTACAC                 |
| pCCA1-R (pMin35S) | cloning      | 5' -GAAAGCTTCACTAAGCTCCTCTACACAACCTT                |
| pPRR9-F (pMin35S) | cloning      | 5' -GAGGATCCCGCGGCCACTAACGAAATTTG                   |
| pPRR9-R (pMin35S) | cloning      | 5' -GAAAGCTTCACTAAGCTCCTCTACACAACCTT                |
| 35S:JMJ29-GFP-F   | cloning      | 5' -GAGTCGACATGGATTCTGGAGTTAAATTGGAG                |
| 35S:JMJ29-GFP-R   | cloning      | 5' -GACCCGGGCAAGAGATAAAAAGACTTGCCTCGAG              |
| 35S:ELF3-HA-F     | cloning      | 5' -CACAAAGTTTGTACAAAAAGCTGAAATGAAGAGAGGGAAAGATGAGG |
| 35S:ELF3-HA-R     | cloning      | 5' -GGCACCACCTTTGTACAAGAAATTAAGGCTTAGAGGAGTCATAGC   |
| JMJ29-F (pGBKT7)  | cloning      | 5' -GACCCGGGGATGGATTCTGGAGTTAAATTGG                 |
| JMJ29-R (pGBKT7)  | cloning      | 5' -GACTGCAGTCAAAGAGATAAAAAGACTTGCCTC               |
| CCA1-F (pGADT7)   | cloning      | 5' -GAGCCGGCATGGAGACAAATTCGTCTGG                    |
| CCA1-R (pGADT7)   | cloning      | 5' -GAGAATTCTCATGTGGAAGCTTGAGTTTC                   |
| LHY-F (pGADT7)    | cloning      | 5' -GACATATGATGGATACTAATACATCTGGAGAAGAATTATTAG      |
| LHY-R (pGADT7)    | cloning      | 5' -GAGGATCCTCATGTAGAGCTTCTCCTCC                    |
| LCL5-F (pGADT7)   | cloning      | 5' -GACCATGGAGATGAGCTCGTCGCGCTC                     |
| LCL5-R (pGADT7)   | cloning      | 5' -GAGAATTCTTATGCTGATTTGTGCGCTTGTG                 |
| TOC1-F (pGADT7)   | cloning      | 5' -GACCATGGAGATGGATTTGAACGGTGAGTG                  |
| TOC1-R (pGADT7)   | cloning      | 5' -GACCCGGGTCAAGTTCCCAAAGCATCATC                   |
| PRR3-F (pGADT7)   | cloning      | 5' -GACCATGGAGATGTGTTTTAATAACATTGAAACTGG            |
| PRR3-R (pGADT7)   | cloning      | 5' -GAGGATCCTCAATTGTCTTCACTTCTGATTTATG              |
| PRR5-F (pGADT7)   | cloning      | 5' -GACATATGATGTGGCAAACGTGGC                        |
| PRR7-F (pGADT7)   | cloning      | 5' -GACCATGGATATGAATGCTAATGAGGAGGGG                 |
| PRR7-R (pGADT7)   | cloning      | 5' -GACCCGGGTTAGCTATCCTCAATGTTTTTTATGTC             |
| PRR9-F (pGADT7)   | cloning      | 5' -GACCATGGATATGGGGGAGATTGTGGTTTTAAG               |
| PRR9-R (pGADT7)   | cloning      | 5' -GACCCGGGTCATGATTTTTGTAGACGCGTCTG                |
| GI-F (pGBKT7)     | cloning      | 5' -GAGAATTCATGGCTAGTTCATCTTCTCATCTGAGAG            |
| GI-R (pGBKT7)     | cloning      | 5' -GAGGATCCCTTATTGGGACAAGGATATAGTACAGCC            |
| LUX-F (pGADT7)    | cloning      | 5' -GACCATGGATATGGGAGAGGAAGTACAAATGAG               |
| LUX-R (pGADT7)    | cloning      | 5' -GACCCGGGCTACATGATACTTTGTATGATCCTCTCC            |
| ELF3-F (pGADT7)   | cloning      | 5' -GAGGATCCATGAAGAGAGGGAAAGATGAGG                  |
| ELF3-R (pGADT7)   | cloning      | 5' -GACTCGAGTTAAGGCTTAGAGGAGTCATAGCG                |
| ELF4-F (pGADT7)   | cloning      | 5' -GACCATGGAGATGAAGAGGAACGGCGAG                    |
| ELF4-R (pGADT7)   | cloning      | 5' -GAGAATTCCTAAGCTCTAGTTCGGGCGAG                   |
| TPL-F (pGADT7)    | cloning      | 5' -GACCATGGAGATGTCTTCTTTAGTAGAGAGCTCG              |
| TPL-R (pGADT7)    | cloning      | 5' -GACCCGGGTCAAACAGGTGACGCGGTTGGTTG                |
| LNK1-F (pGADT7)   | cloning      | 5' -GAGAATTCATGTCCGACTTGTACATTCATGAG                |
| LNK1-R (pGADT7)   | cloning      | 5' -GACTCGAGTTAATTGTTGTCACCTGTTTACAACCTCTG          |
| LNK2-F (pGADT7)   | cloning      | 5' -GACCATGGAGATGATATGGGGTGATGATGCTG                |
| LNK2-R (pGADT7)   | cloning      | 5' -GACCCGGGTCACAAATTTCTTTTCTTCTCCTG                |

RT-qPCR primers were designed using the Primer Express Software installed into the Applied Biosystems PCR System. The sizes of PCR products ranged from 80 to 300 nucleotides in length. F, forward primer; R, reverse primer.

## Supplementary Table S2. List of primers used in chromatin immunoprecipitation (ChIP) assays

| Primer      | Sequence                       |
|-------------|--------------------------------|
| CCA1 (A) -F | CTTCTCTTTGTATCACTTGAACCAA      |
| CCA1 (A) -R | GAATTTGAGTCTTCCATTCTCAGTATTA   |
| CCA1 (B) -F | ATATAAAACTATGGCCCAAATAAGTTTAG  |
| CCA1 (B) -R | ATCTTGATCTAGTGGGACCTAC         |
| CCA1 (C) -F | CATTTCCGTAGCTTCTGGTCTCTT       |
| CCA1 (C) -R | ATCAGCTTGGATTCGATAAAGATTG      |
| CCA1 (D) -F | ACTCGGAAGCCATATACGATAAC        |
| CCA1 (D) -R | CAAAGCTTCAATGAATCTATTATG       |
| LHY (A) -F  | CTACATGCTTCGGTTAAGAC           |
| LHY (A) -R  | TCTTCATCTTTTCATATAAATCATGCAATG |
| LHY (B) -F  | TCCTCCATGGCTACTCTCAAGG         |
| LHY (B) -R  | TCAGCAGCCAAACAGAGATCTTAG       |
| ELF3 (A) -F | TTTAGTAAATAAGAGTGTCCAAGTG      |
| ELF3 (A) -R | AGAAACATAGCAAAAGCTCTAG         |
| ELF3 (B) -F | AACCTCTAACATGGTAATATATCTATG    |
| ELF3 (B) -R | ATCATCCAATACATCACTTTTTG        |
| TOC1 (A) -F | AAGAACTATCCGAATAACTTCATGC      |
| TOC1 (A) -R | TTTGATGAAATTCCTCAGAGAAGATG     |
| TOC1 (B) -F | AACAGAAAAATAAAATCTGATAATAG     |
| TOC1 (B) -R | AAACCAAATTTAGGATTTCG           |
| PRR7 (A) -F | TTTGTCTTTTAGCACTATACGGTC       |
| PRR7 (A) -R | TTCTCCTTCAGTGTTCCTTC           |
| PRR7 (B) -F | CTCTCCGCCAAAATCTATCAACGGTC     |
| PRR7 (B) -R | GAAGTCCACGTCAGAGCGGATATTTC     |
| PRR9 (A) -F | ATCACCGTCCTTCAACTTC            |
| PRR9 (A) -R | TATAACTACTGTTTTGTGCTGTTG       |
| PRR9 (B) -F | CTTCGATAAGCTTAAATCATTTTC       |
| PRR9 (B) -R | TCCAGGYGAAAGTGATCGATG          |
| PRR9 (C) -F | CGGCCACTAACGAAATTTGA           |
| PRR9 (C) -R | GCAGGTCCACCTTAAACAGT           |
| PRR9 (D) -F | TCTCGGTAGATTAAGATCTAAAGCTCGTTG |
| PRR9 (D) -R | CAACACTTGGTAAAACCAACAAAGCCTA   |

F, forward primer; R, reverse primer.
